# Supplementary material
Source: PubMed Central journal article supplement (PMC3396514)
Supplement: 1208003109_pnas.201208003SI.pdf [file 1208003109_pnas.201208003SI.pdf]

# Supporting Information

Bart et al. 10.1073/pnas.1208003109

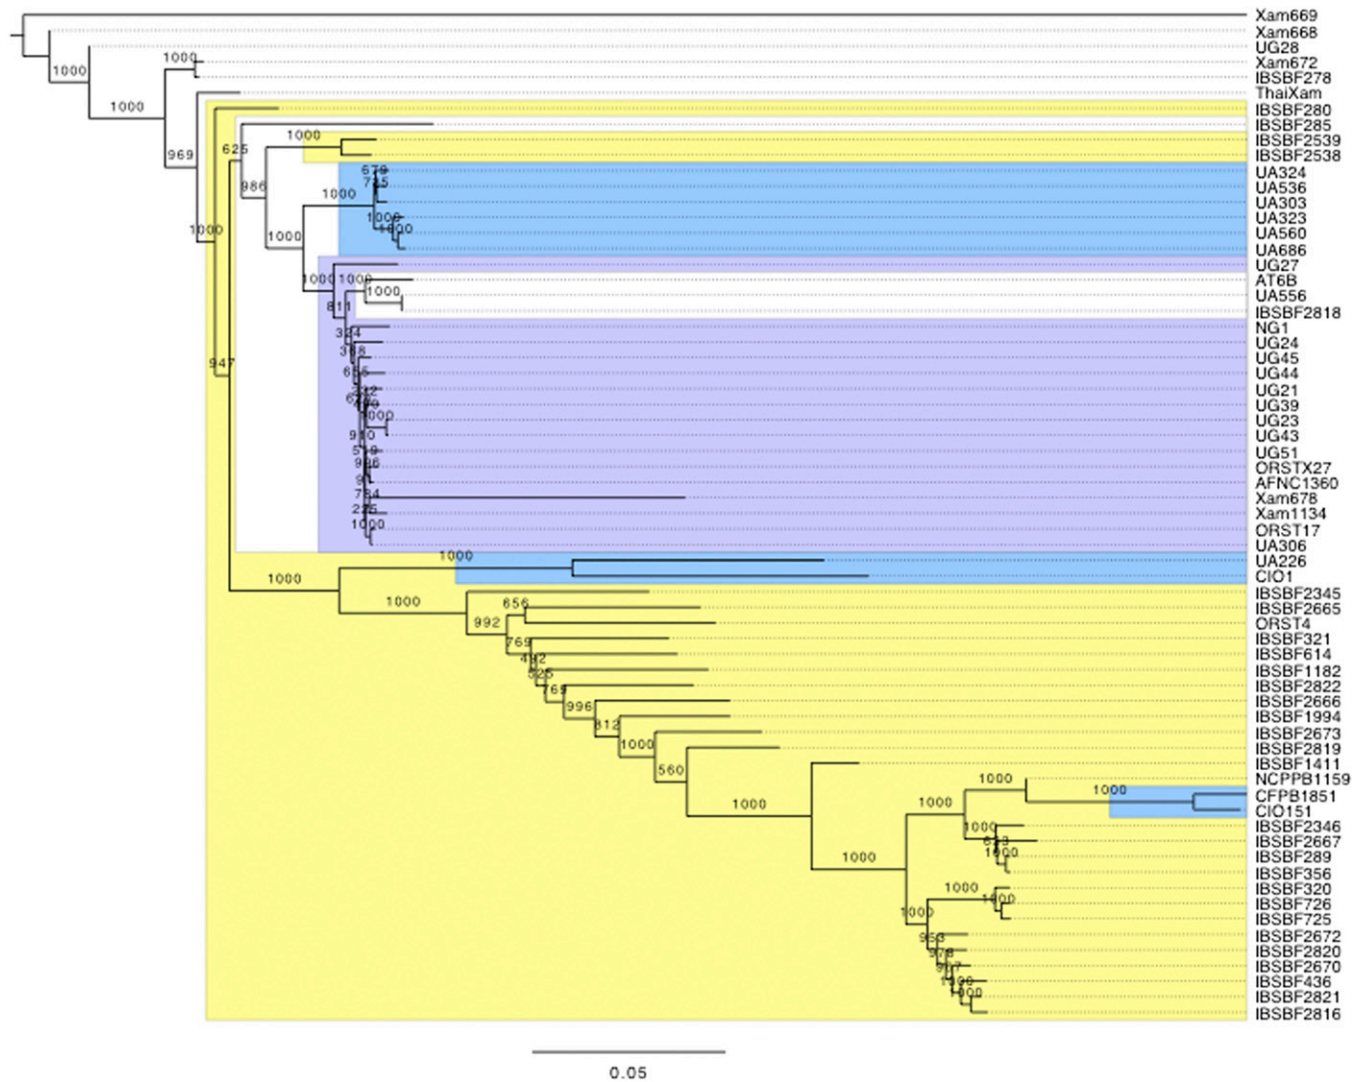

**Fig. S1.** Neighbor-joining analysis of *Xam* strains. Colors indicate geographic origins. Analysis is based on same data as in Fig. 2. CLC Genomics Workbench was used for reference-based assemblies and SNP identification for each *Xam* strain was compared with the *Xam668* genome (*Materials and Methods*). *Xam* strains cluster primarily by geographic region with a few outliers. Yellow, Brazil; blue, Colombia; purple, Africa; white, other/geographic outliers. Bootstrap (1,000 replicates) was performed as a test of significance. Tree is unrooted.

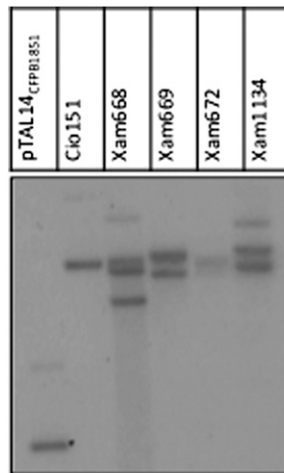

**Fig. S2.** *Xam* strains contain diverse transcription activator-like (TAL) effector-containing plasmid profiles. Plasmid DNA was isolated and run on a 0.75% agarose gel. Southern analysis was performed to assess the TAL effector sequence content of each plasmid.

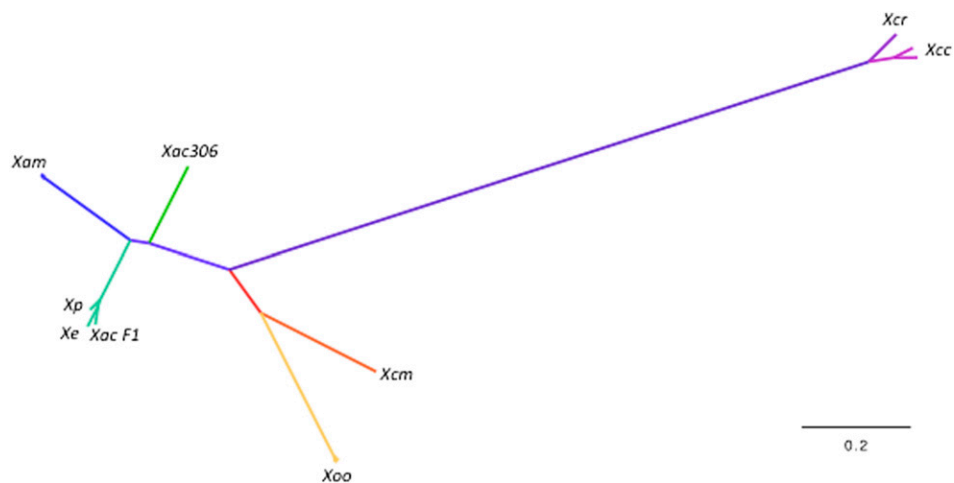

**Fig. S3.** Maximum-likelihood phylogeny of sequenced xanthomonads places *Xanthomonas axonopodis* pv. *manihotis* (*Xam*) among its closest relatives. Phylogeny is based on full-genome SNP analysis, 1,442,868 SNPs (*Materials and Methods*). *Xam*, strains NG1, Xam1134, Xam678, Xam668, Xam672, CLO151, and Xam669 cluster together; *Xp*, *Xanthomonas perforans* 91–118; *Xe*, *Xanthomonas euvesicatoria* 85–10; *Xac F1*, *X. axonopodis* pv. *citrumello F1*; *Xac306*, *X. a.* pv. *citri*; *Xoo*, *Xanthomonas oryzae* pv. *oryzae*, strains Pxo99A, 311018, and 10331 cluster together; *Xcm*, *Xanthomonas campestris* pv. *musacearum*; *Xcc*, *X. c.* pv. *campestris*, strains B100, 8004, and 33913 cluster together; *Xcr*, *X. c.* pv. *raphani* 756C.









Table S1. Xam strain and assembly information

| Strain    | Year | Origin           | Collector | Assembly statistics* |           |         |         |        |        |            |
|-----------|------|------------------|-----------|----------------------|-----------|---------|---------|--------|--------|------------|
|           |      |                  |           | N50                  | Length    | Contigs | Max     | Mean   | SD     | Reads      |
| AFNC1360  | 1998 | Benin or Nigeria | AFNC      | 25                   | 4,923,650 | 150     | 235,381 | 32,824 | 37,800 | 20,051,776 |
| AT6B      | 2006 | Venezuela        | M.S.      | 22                   | 4,946,093 | 163     | 237,170 | 30,344 | 39,662 | 19,151,609 |
| CFBP1851  | 1974 | Columbia         | CFBP      | 17                   | 4,798,436 | 123     | 281,156 | 39,011 | 52,886 | 3,310,501  |
| CIO1      | 1995 | Columbia         | CIO       | 19                   | 4,898,899 | 128     | 211,998 | 38,272 | 45,752 | 13,719,586 |
| CIO151    | 1995 | Columbia         | CIO       | 24                   | 4,911,246 | 175     | 150,154 | 28,064 | 35,954 | 25,616,672 |
| UA226     | 2008 | Columbia         | A.B.      | 18                   | 4,951,862 | 129     | 290,136 | 38,386 | 49,473 | 11,330,262 |
| UA303     | 2008 | Columbia         | A.B.      | 23                   | 4,872,968 | 130     | 196,821 | 37,484 | 39,723 | 15,222,193 |
| UA306     | 2008 | Columbia         | A.B.      | 23                   | 5,065,231 | 144     | 235,368 | 35,175 | 42,248 | 15,102,007 |
| UA323     | 2008 | Columbia         | A.B.      | 23                   | 4,872,007 | 151     | 173,776 | 32,264 | 37,606 | 20,612,168 |
| UA324     | 2008 | Columbia         | A.B.      | 22                   | 4,916,013 | 146     | 161,357 | 33,671 | 38,915 | 90,20,217  |
| UA536     | 2009 | Columbia         | A.B.      | 23                   | 4,866,301 | 142     | 183,757 | 34,269 | 39,356 | 16,292,631 |
| UA556     | 2009 | Columbia         | A.B.      | 22                   | 4,842,655 | 139     | 237,273 | 34,839 | 41,407 | 11,470,344 |
| UA560     | 2009 | Columbia         | A.B.      | 27                   | 4,897,922 | 154     | 176,262 | 31,804 | 33,527 | 17,000,477 |
| UA686     | 2009 | Columbia         | A.B.      | 22                   | 4,898,003 | 143     | 196,787 | 34,251 | 40,679 | 15,947,863 |
| IBSBF1182 | 1995 | Brazil           | IBSBF     | 128                  | 4,773,692 | 648     | 46,493  | 7,366  | 6,968  | 2,149,549  |
| IBSBF1411 | 1998 | Brazil           | IBSBF     | 15                   | 4,856,132 | 130     | 314,799 | 37,354 | 55,031 | 4,275,532  |
| IBSBF1994 | 2004 | Brazil           | IBSBF     | 137                  | 4,774,518 | 677     | 45,564  | 7,052  | 6,508  | 2,232,128  |
| IBSBF2345 | 2006 | Brazil           | IBSBF     | 19                   | 4,819,772 | 128     | 286,963 | 37,654 | 47,959 | 1,904,256  |
| IBSBF2346 | 2006 | Brazil           | IBSBF     | 18                   | 4,874,593 | 122     | 257,932 | 39,955 | 48,696 | 17,994,941 |
| IBSBF2538 | 2007 | Brazil           | IBSBF     | 122                  | 4,833,429 | 573     | 50,456  | 8,435  | 7,446  | 3,398,164  |
| IBSBF2539 | 2007 | Brazil           | IBSBF     | 24                   | 4,952,612 | 138     | 196,970 | 35,888 | 39,356 | 15,572,597 |
| IBSBF2665 | 2009 | Brazil           | IBSBF     | 83                   | 4,836,797 | 434     | 111,173 | 11,144 | 11,333 | 1,893,919  |
| IBSBF2666 | 2009 | Brazil           | IBSBF     | 49                   | 4,842,277 | 311     | 123,056 | 15,570 | 18,537 | 2,797,254  |
| IBSBF2667 | 2009 | Brazil           | IBSBF     | 21                   | 4,913,060 | 138     | 226,291 | 35,601 | 42,268 | 13,781,769 |
| IBSBF2670 | 2009 | Brazil           | IBSBF     | 17                   | 4,902,902 | 139     | 28,0128 | 35,272 | 50,872 | 13,653,945 |
| IBSBF2672 | 2009 | Brazil           | IBSBF     | 18                   | 4,856,510 | 131     | 257,571 | 37,072 | 48,420 | 8,192,559  |
| IBSBF2673 | 2009 | Brazil           | IBSBF     | 53                   | 4,830,620 | 305     | 120,981 | 15,838 | 17,359 | 2,649,843  |
| IBSBF278  | 1965 | Brazil           | IBSBF     | 20                   | 5,020,210 | 138     | 239,334 | 36,378 | 44,921 | 12,084,985 |
| IBSBF280  | 1973 | Brazil           | IBSBF     | 171                  | 4,842,752 | 850     | 41,005  | 5,697  | 5,251  | 1,750,289  |
| IBSBF2816 | 2010 | Brazil           | IBSBF     | 19                   | 4,902,619 | 145     | 256,960 | 33,811 | 46,242 | 13,153,736 |
| IBSBF2818 | 2010 | Brazil           | IBSBF     | 22                   | 4,851,686 | 139     | 235,402 | 34,904 | 42,367 | 11,474,331 |
| IBSBF2819 | 2010 | Brazil           | IBSBF     | 104                  | 4,852,810 | 557     | 59,730  | 8,712  | 8,583  | 2,479,861  |
| IBSBF2820 | 2010 | Brazil           | IBSBF     | 19                   | 4,930,429 | 150     | 257,651 | 32,869 | 44,768 | 9,028,899  |
| IBSBF2821 | 2010 | Brazil           | IBSBF     | 21                   | 4,906,958 | 161     | 257,592 | 30,478 | 41,909 | 13,077,491 |
| IBSBF2822 | 2010 | Brazil           | IBSBF     | 93                   | 4,831,349 | 464     | 57,666  | 10,412 | 9,543  | 2,033,714  |
| IBSBF285  | 1973 | Nigeria          | IBSBF     | 21                   | 4,972,047 | 147     | 186,156 | 33,823 | 40,851 | 12,946,844 |
| IBSBF289  | ?    | Brazil           | IBSBF     | 23                   | 4,847,529 | 155     | 226,288 | 31,274 | 38,049 | 15,106,454 |
| IBSBF320  | 1974 | Brazil           | IBSBF     | 17                   | 4,803,726 | 121     | 257,673 | 39,700 | 49,436 | 14,285,701 |
| IBSBF321  | 1974 | Brazil           | IBSBF     | 183                  | 4,593,056 | 888     | 35,503  | 5,172  | 4,646  | 1,869,048  |
| IBSBF356  | 1980 | Brazil           | IBSBF     | 18                   | 4,847,079 | 130     | 257,951 | 37,285 | 49,019 | 14,264,479 |
| IBSBF436  | 1982 | Brazil           | IBSBF     | 19                   | 4,903,327 | 149     | 257,580 | 32,908 | 44,502 | 13,185,959 |
| IBSBF614  | 1987 | Brazil           | IBSBF     | 136                  | 4,730,788 | 706     | 51,491  | 6,700  | 6,516  | 2,138,932  |
| IBSBF725  | 1988 | Brazil           | IBSBF     | 19                   | 4,886,517 | 141     | 257,945 | 34,656 | 45,893 | 14,295,676 |
| IBSBF726  | 1988 | Brazil           | IBSBF     | 21                   | 4,832,905 | 140     | 257,968 | 34,520 | 43,377 | 17,714,917 |
| NCPBP1159 | 1941 | Brazil           | NCPBP     | 17                   | 4,797,980 | 128     | 257,906 | 37,484 | 48,746 | 13,904,209 |
| NG1       | 2011 | Nigeria          | L.K.      | 160                  | 4,737,721 | 785     | 38,252  | 6,035  | 5,419  | 3,934,608  |
| ORST17    | 1984 | Congo            | ORST      | 23                   | 5,128,104 | 177     | 235,384 | 28,972 | 40,180 | 15,379,085 |
| ORST4     | 1974 | Columbia         | ORST      | 161                  | 4,650,210 | 767     | 36,169  | 6,062  | 5,309  | 1,942,504  |
| ORST X27  | 1989 | Togo             | ORST      | 21                   | 4,931,909 | 133     | 237,243 | 37,082 | 43,419 | 14,896,651 |
| ThaiXam   | 1997 | Thailand         | N.K.      | 62                   | 4,874,623 | 324     | 84,544  | 15,045 | 14,840 | 2,770,771  |
| UG21      | 2011 | Uganda           | T.A.      | 23                   | 5,010,468 | 148     | 237,252 | 33,854 | 40,078 | 18,213,584 |
| UG23      | 2011 | Uganda           | T.A.      | 22                   | 4,924,062 | 133     | 237,150 | 37,023 | 42,562 | 8,918,645  |
| UG24      | 2011 | Uganda           | T.A.      | 20                   | 4,909,909 | 145     | 233,940 | 33,861 | 43,565 | 5,036,494  |
| UG27      | 2011 | Uganda           | T.A.      | 19                   | 4,903,342 | 131     | 268,832 | 37,430 | 47,341 | 3,629,887  |
| UG28      | 2011 | Uganda           | T.A.      | 131                  | 4,722,734 | 676     | 54,751  | 6,986  | 6,899  | 9,803,349  |
| UG39      | 2011 | Uganda           | T.A.      | 21                   | 4,911,502 | 130     | 237,280 | 37,780 | 43,922 | 10,380,844 |
| UG43      | 2011 | Uganda           | T.A.      | 23                   | 4,924,182 | 145     | 237,167 | 33,959 | 41,100 | 16,650,194 |
| UG44      | 2011 | Uganda           | T.A.      | 24                   | 4,895,442 | 141     | 238,358 | 34,719 | 40,012 | 19,277,873 |
| UG45      | 2011 | Uganda           | T.A.      | 59                   | 4,986,397 | 323     | 83,811  | 15,437 | 15,477 | 5,338,599  |
| UG51      | 2011 | Uganda           | T.A.      | 22                   | 4,871,289 | 140     | 234,400 | 34,794 | 41,630 | 14,764,547 |
| Xam1134   | ?    | ?                | ?         | 28                   | 4,894,844 | 158     | 237,227 | 30,980 | 34,575 | 29,876,966 |

**Table S1. Cont.**

| Strain | Year | Origin    | Collector | Assembly statistics* |           |         |         |        |        |            |
|--------|------|-----------|-----------|----------------------|-----------|---------|---------|--------|--------|------------|
|        |      |           |           | N50                  | Length    | Contigs | Max     | Mean   | SD     | Reads      |
| Xam668 | 1978 | Indonesia | NZTCC     | 29                   | 4,954,860 | 195     | 276,859 | 25,409 | 33,003 | 12,733,850 |
| Xam669 | 1973 | Brazil    | NZTCC     | 21                   | 4,820,297 | 137     | 201,435 | 35,184 | 40,806 | 15,193,524 |
| Xam672 | 1976 | Cameroon  | NZTCC     | 25                   | 5,016,075 | 165     | 239,253 | 30,400 | 37,139 | 22,340,056 |
| Xam678 | 1973 | DR Congo  | NZTCC     | 47                   | 4,894,142 | 56      | 104,760 | 19,117 | 19,014 | 7,734,076  |

A.B., Adriana Bernal; L.K., Lava Kumar; MS., María Angélica Santana; N.K., Nuttima Kositcharoenkul; T.A., Titus Alicai.  
 \*N50, the smallest number of contigs needed to make up half of the assembly; Length, sum of all contig lengths (nucleotides);  
 Max, maximum contig length; Mean, mean contig length; SD, SD from the mean contig length; Reads, total number of reads  
 contributing to each assembly.

**Table S2. Illumina sequencing price breakdown**

| Item                 | Price per sample, \$* |
|----------------------|-----------------------|
| Library construction | 15                    |
| Reagents             | 70                    |
| Sequencing           | 35                    |
| Total                | 120                   |

\*Price assumes use of Apollo 324 automated library prep, IntegenX reagents, sequencing primers ordered through Integrated DNA Technology (PAGE purified), and 48 samples multiplexed in one lane of an Illumina Hi-Seq2000. Prices are current for University of California members as of 2010.

## Other Supporting Information Files

[Dataset S1 \(XLS\)](#)
